# Supplementary material for: The Ca2+ transient as a feedback sensor controlling cardiomyocyte ionic conductances in mouse populations
Source: eLife journal article supplement (doi:10.7554/elife.36717), 2018-09-25
Supplement: supp [file elife_poa_e36717_Figure_4_source_data_1.xls]

## Sheet: Sheet1
			Ica							IK
							Ikur				Ito				Ikss
		mean	se	n		mean	se	n		mean	se	n		mean	se	n
a/j		13.7195	1.23085	19		11.618	2.79089	13		13.0373	1.64818	14		5.23445	0.48377	13
axb1/pgnj						10.0875	0.92012	4		4.99667	0.24168	3		6.46333	0.80898	3
Axb13/pgnj						13.5675	3.25253	8		13.3513	3.90252	8		4.9525	0.5018	9
axb8/pgnj		7.355	1.09612	6
balb/cbyj		10.7228	1.3951	9		11.496	2.03274	10		7.46938	0.82615	9		8.197	0.62438	10
BTBR T+tf/J		14.7567	1.14159	6		16.4236	2.78295	11		9.271	1.43985	10		6.093	0.39553	9
bxa12/pgnj		11.0133	0.98995	9		15.6643	1.70548	8		11.8987	2.18027	8		8.34556	1.30065	9
Bxa14/pgnj		11.2809	1.00796	15
bxa25/pgnj		17.57	4.81376	5		15.8049	1.74509	7		11.627	1.59613	7		7.11986	1.31554	6
bxa4/pgnj		11.7761	1.19476	13
bxd34/tyj		11.1256	1.13741	9
bxh22.kccj						6.4425	0.72052	8		6.32875	0.56107	8		8.3875	0.86256	8
BXH6/Tyj		7.32625	0.59327	16		5.954	0.43731	10		8.73172	0.67617	11		7.98545	0.87545	11
c57bl/6j		7.3925	0.93181	10		7.82727	1.45134	11		7.594	0.92097	10		9.16273	1.62148	11
cba/j		7.956	0.81269	10
cxb1/byj		11.9391	0.81022	11		11.6956	1.42095	9		8.73883	1.11087	10		6.089	0.5724	10
cxb11/hia		7.63625	0.89344	8		8.90316	2.49755	6		8.42537	1.24635	7		6.8481	1.3638	7
cxb7/byj		9.05386	0.6087	16
CXB9/HiAj						8.44	2.64503	8		6.30714	1.26912	7		8.73	1.39299	8
sjl/j		11.2745	0.99708	20
a/j 13.71 29.87
balb/cbyj 10.72 27.153
bxa12/pgnj 11.01 35.12
bxa25/pgnj 21.33 34.53	17.57	34.53
BXH6/Tyj 7.32 22.66
cxb1/byj 11.93 26.509
cxb11/hia 7.63 24.16
