# Supplementary material for: The Ca2+ transient as a feedback sensor controlling cardiomyocyte ionic conductances in mouse populations
Source: eLife journal article supplement (doi:10.7554/elife.36717), 2018-09-25
Supplement: supp [file elife_poa_e36717_Figure_4_source_data_2.xlsx]

## Sheet: Sheet1
Bxa12/pgnj
pacing frequency (Hz)			shortening
	#1	#2	#3	#4	#5		mean	se
1	0.11	0.096	0.1	0.224	0.09		0.124	0.02521
1.33	0.093	0.113	0.088	0.184	0.08		0.1116	0.0189
2	0.075	0.074	0.083	0.155	0.07		0.0914	0.01604
2.5	0.075	0.053	0.079	0.155	0.066		0.0856	0.01792
3.33	0.07	0.061	0.08	0.155	0.05		0.0832	0.01862
4	0.071	0.06	0.083	0.154	0.05		0.0835	0.0184
5	0.08	0.056	0.088	0.166	0.053		0.0886	0.02049																	0.0836	0.01844	5		0.418	0.00161469	0.00850084
6.67	0.095	0.0654	0.093	0.155	0.049		0.09148	0.01808																	0.11821	0.01083	14		1.65494	0.00387623	0.0229886
10	0.095	0.07	0.085	0.152	0.054		0.0912	0.01671																	0.09786	0.0096	7		0.68502	9.63734e-05	0.00451584
																									0.105	0.01592	5		0.525	5.88082e-05	0.00633616
																mean	se								0.094	0.01523	6		0.564	0.000343873	0.0083503
pacing frequency (Hz)			shortening																						0.0838	0.01116	5		0.419	0.00157895	0.00311364
	#1	#2	#3	#4	#5	#6	#7	#8	#9	#10	#11	#12	#13	#14
1	0.21	0.15	0.085	0.15	0.156	0.08	0.17	0.1875	0.186	0.11	0.098	0.13	0.086	0.07		0.13346	0.01223							overall mean	0.10157					0.00756893	0.0538054
1.33	0.21	0.141	0.077	0.14	0.14	0.074	0.129	0.16	0.172	0.09	0.077	0.13	0.09	0.079		0.12207	0.01126													0.00151379	0.00149459
2	0.195	0.136	0.073	0.12	0.14	0.074	0.124	0.159	0.117	0.073	0.077	0.103	0.08	0.07		0.11007	0.01028
2.5	0.201	0.114	0.077	0.12	0.144	0.085	0.118	0.159	0.104	0.085	0.07	0.108	0.086	0.07		0.11007	0.00999
3.33	0.201	0.118	0.093	0.14	0.144	0.086	0.13	0.16	0.108	0.079	0.077	0.103	0.1	0.075		0.11529	0.00972													1.01284
4	0.219	0.114	0.1	0.136	0.16	0.098	0.125	0.167	0.09	0.085	0.08	0.103	0.107	0.071		0.1182	0.0108										42
5	0.219	0.114	0.112	0.158	0.16	0.112	0.1	0.176	0.097	0.086	0.097	0.98	0.107	0.089		0.18621	0.06193
6.67	0.21	0.128		0.145	0.158	0.127	0.1	0.189	0.104	0.092	0	0.107	0	0.1		0.11231	0.017
10	0.219	0.14		0.154		--
BTBR T + tf/j
pacing frequency (Hz)	#1	#2	#3	#4	#5	#6	#7		mean	se
1	0.08	0.148	0.106	0.076	0.103	0.131	0.128		0.11029	0.01015
1.33	0.081	0.143	0.098	0.07	0.103	0.18	0.135		0.11571	0.01465
2	0.083	0.13	0.077	0.07	0.103	0.13	0.123		0.10229	0.00978
2.5	0.083	0.13	0.063	0.07	0.113	0.118	0.104		0.09729	0.00966
3.33	0.087	0.134	0.077	0.07	0.118	0.098	0.092		0.09657	0.00854
4	0.107	0.139	0.084	0.07	0.122	0.083	0.08		0.0978	0.0095
5	0.116	0.128	0	0.07	0.122	0	0.08		0.07371	0.02069
6.67	0.116	0.134	0	0.07	0.13	0	0.092		0.07743	0.02166
10	0.108	0.121		0.07	0	0	0.086		0.06417	0.02152
Balb/cbyj
pacing frequency (Hz)	#1	#2	#3	#4	#5		mean	se
1	0.13	0.122	0.087	0.172	0.163	--	0.1348	0.01525
1.33	0.12	0.082	0.087	0.18	0.135	--	0.1208	0.01783
2	0.1	0.133	0.099	0.163	0.136	--	0.1262	0.01209
2.5	0.079	0.1	0.1	0.16	0.114	--	0.1106	0.01356
3.33	0.064	0.1	0.107	0.145	0.112	--	0.1056	0.01296
4	0.053	0.093	0.117	0.15	0.112	--	0.105	0.0158
5	0.049	0.093	0.131	0.16	0.112	--	0.109	0.01864
6.67		0.093	0.1	0.154	0.103		0.1125	0.01399
10		0.083
C57BL/6
pacing frequency (Hz)	#1	#2	#3	#4	#5	#6		mean	se
1	0.156	0.1	0.131	0.122	0.159	0.144		0.13533	0.00914
1.33	0.1197	0.086	0.092	0.09	0.172	0.106		0.11095	0.01323
2	0.1	0.073	0.054	0.09	0.153	0.0941		0.09402	0.01363
2.5	0.099	0.069	0.05	0.085	0.153	0.098		0.09233	0.01431
3.33	0.099	0.069	0.05	0.085	0.159	0.102		0.094	0.01523
4	0.1056	0.065	0	0.085	0.15	0		0.0989	0.016
5	0.109	0	0	0.085	0	0		0.03233	0.02068
6.67	0	0	0	0	0	0		0	0
10	0	0	0	0	0	0		0	0
BXA25/pgnj
pacing frequency (Hz)	#1	#2	#3	#4	#5		mean	se
1	0.094	0.081	0.141	0.158	0.104		0.1156	0.01456
1.33	0.093	0.075	0.137	0.143	0.092		0.108	0.01348
2	0.082	0.064	0.14	0.091	0.079		0.0912	0.01295
2.5	0.076	0.064	0.137	0.083	0.079		0.0878	0.0127
3.33	0.076	0.07	0.137	0.071	0.079		0.0866	0.01271
4	0.082	0.07	0.127	0.065	0.075		0.0838	0.01116
5	0.076	0.076	0.108	0.059	0.079		0.0796	0.00793
