# Supplementary material for: The Ca2+ transient as a feedback sensor controlling cardiomyocyte ionic conductances in mouse populations
Source: eLife journal article supplement (doi:10.7554/elife.36717), 2018-09-25
Supplement: supp [file elife_poa_e36717_Table_2_source_data_1.xlsx]

## Sheet: 13_ica_strains
Strain	Heart mass pre-ISO	Heart mass post-ISO
A/J	0.0886667	0.133
AXB8/PgnJ	0.087	0.0992
BALB/cByJ	0.10105	0.1389
BTBRT<+>tf/J	0.14162	0.223
BXA-12/PgnJ	0.064	NA
BXA-14/PgnJ	0.0975	0.1248
BXA-4/PgnJ	0.1031	0.14675
BXD-34/TyJ	0.1215	NA
BXH-6/TyJ	0.0845	0.0878
C57BL/6J	0.0967167	0.1222
CBA/J	0.0953333	0.13
CXB-11/HiAJ	0.1135	0.1255
CXB-7/ByJ	0.109	0.1475
SJL/J	0.087	0.123333
