# Supplementary figures and images for: The Ca2+ transient as a feedback sensor controlling cardiomyocyte ionic conductances in mouse populations
Source: eLife journal article supplement (doi:10.7554/elife.36717), 2018-09-25

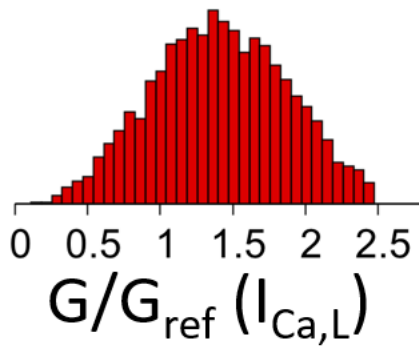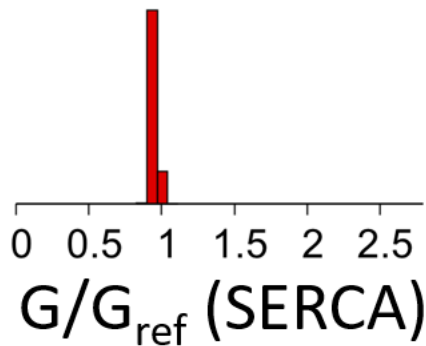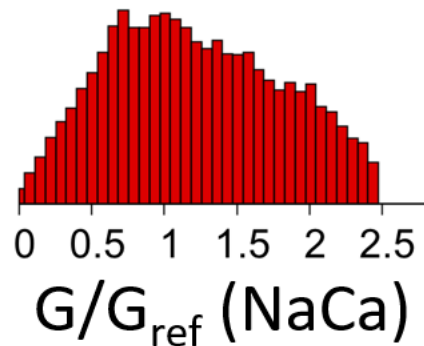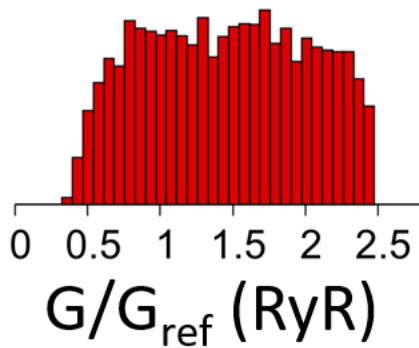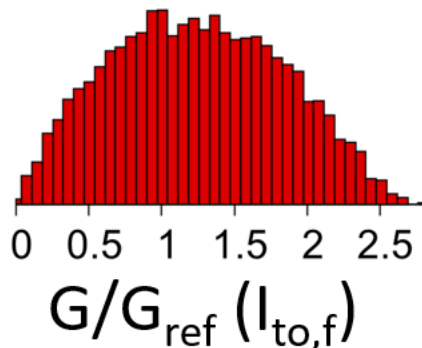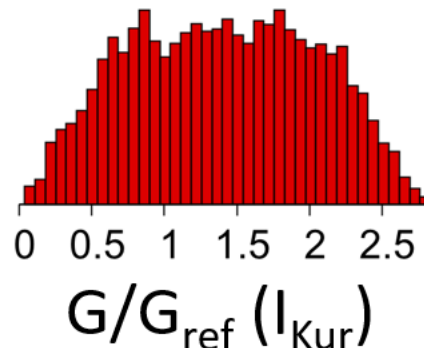

Supplement: supp [file elife_poa_e36717_Figure_3_figure_supplement_1.pdf › elife_poa_e36717_Figure_3_figure_supplement_1.pdf]

**A**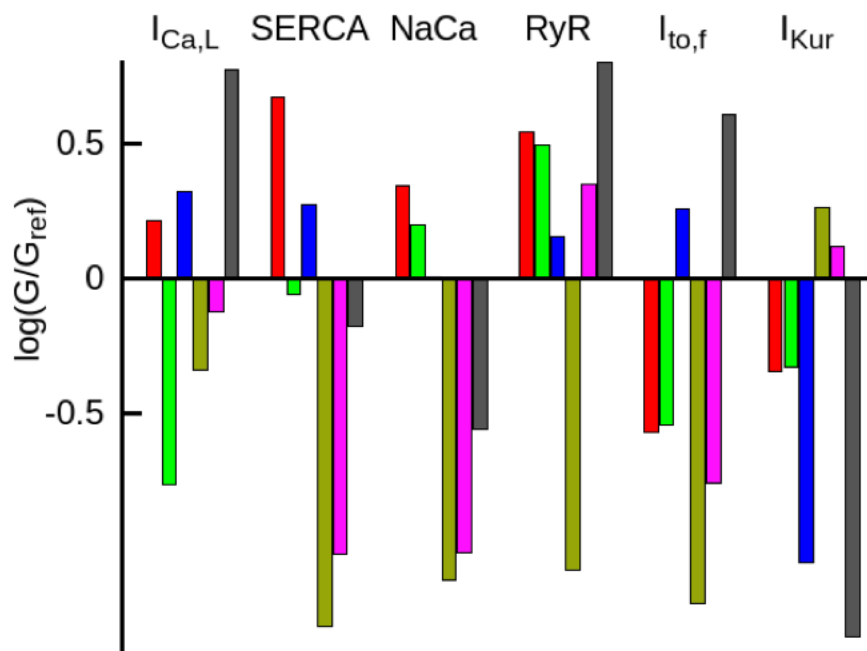**B**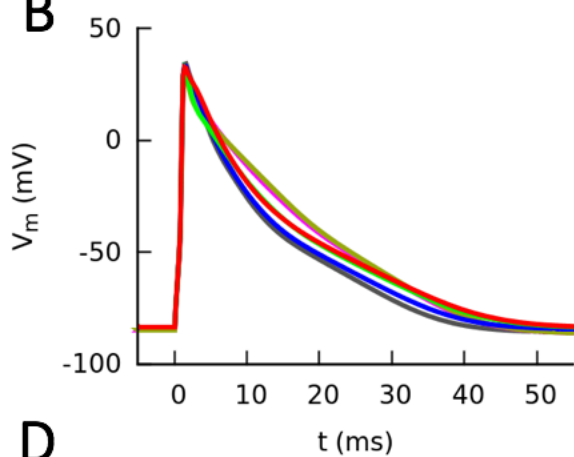**C**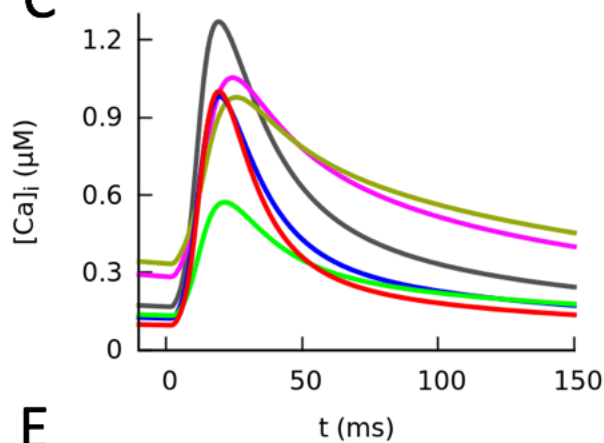**D**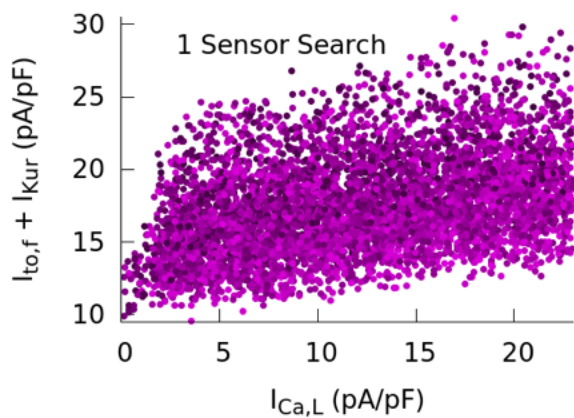**E**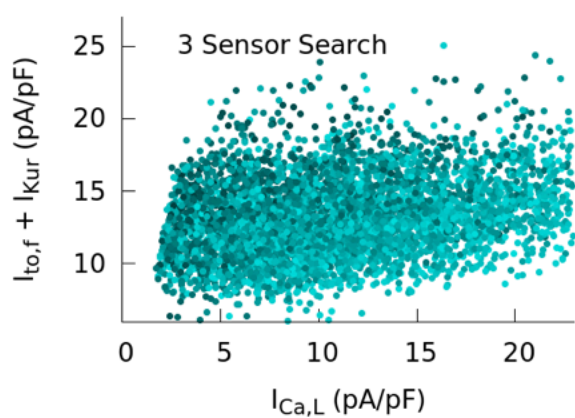

Supplement: supp [file elife_poa_e36717_Figure_3_figure_supplement_3.pdf › elife_poa_e36717_Figure_3_figure_supplement_3.pdf]

**A**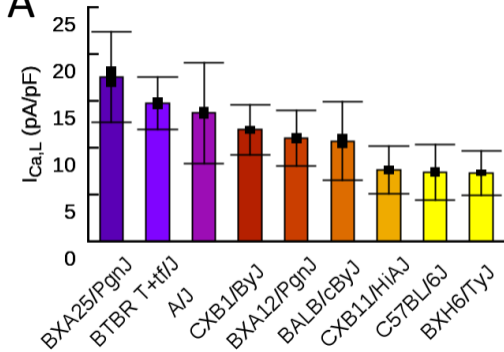**B**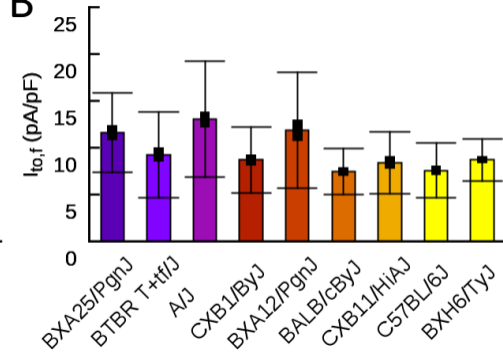**C**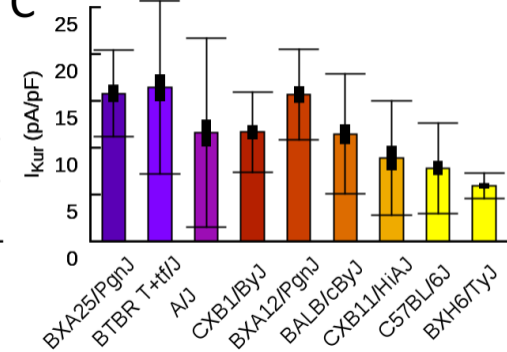

Supplement: supp [file elife_poa_e36717_Figure_4_figure_supplement_1.pdf › elife_poa_e36717_Figure_4_figure_supplement_1.pdf]
